# Supplementary material for: Improvement in twins handwriting identification with invariants discretization
Source: Springer Nature journal article supplement (doi:10.1186/1687-6180-2012-48), 2012-02-28
Supplement: 13634_2011_159_MOESM5_ESM.pdf [file 13634_2011_159_MOESM5_ESM.pdf]

|       |      |       |       |     |       |       |     |     |
|-------|------|-------|-------|-----|-------|-------|-----|-----|
| 5.153 | 1.72 | 2.382 | 0.709 | 1.8 | 2.656 | 8.576 | 2.5 | 15a |
| 3.511 | 3.07 | 3.308 | 0.668 | 1.8 | 5.890 | 5.255 | 2.2 | 15b |
| 3.957 | 1.94 | 2.506 | 0.682 | 0.9 | 3.359 | 8.978 | 2.1 | 15b |
| 4.810 | 1.63 | 2.162 | 0.702 | 1.4 | 2.875 | 3.905 | 2.2 | 15a |
| 6.702 | 1.96 | 2.636 | 0.684 | 4.4 | 6.015 | 1.351 | 2.6 | 15a |
| 3.408 | 2.57 | 2.958 | 0.694 | 0.9 | 5.046 | 0.204 | 2.3 | 15a |
| 6.520 | 1.65 | 1.937 | 0.707 | 0.9 | 2.234 | 5.760 | 2.8 | 15a |
| 4.934 | 1.78 | 2.665 | 0.692 | 1.8 | 2.796 | 1.467 | 2.4 | 15b |
| 7.593 | 1.29 | 2.194 | 0.698 | 1.8 | 0.125 | 8.296 | 2.7 | 15b |
| 5.827 | 2.39 | 2.864 | 0.694 | 1.8 | 5.046 | 2.413 | 2.3 | 15b |
| 6.021 | 1.59 | 2.460 | 0.703 | 2.3 | 0.203 | 2.510 | 2.4 | 17a |
| 5.029 | 1.85 | 2.566 | 0.694 | 1.8 | 3.078 | 5.014 | 2.5 | 17a |
| 2.297 | 1.77 | 2.553 | 0.703 | 1.4 | 1.328 | 9.648 | 2.3 | 17a |
| 5.395 | 1.70 | 2.535 | 0.703 | 1.4 | 2.031 | 7.697 | 2.6 | 17a |
| 6.841 | 2.33 | 3.095 | 0.688 | 2.7 | 3.359 | 9.920 | 2.7 | 17a |
| 7.645 | 2.41 | 2.945 | 0.700 | 1.8 | 5.750 | 4.322 | 2.5 | 17a |
| 4.975 | 2.10 | 2.931 | 0.703 | 1.4 | 2.734 | 7.487 | 2.6 | 17b |
| 6.024 | 2.02 | 2.902 | 0.698 | 2.2 | 2.156 | 4.012 | 2.7 | 17b |
| 2.404 | 2.58 | 3.087 | 0.694 | 1.9 | 5.625 | 0.202 | 2.3 | 17b |
| 2.856 | 2.21 | 2.875 | 0.682 | 2.7 | 4.625 | 1.928 | 2.3 | 17b |
| 5.680 | 3.28 | 3.786 | 0.680 | 2.3 | 7.234 | 6.840 | 2.5 | 17b |
| 5.315 | 2.37 | 2.818 | 0.721 | 5.4 | 7.015 | 1.157 | 2.6 | 17b |
| 6.947 | 3.27 | 3.349 | 0.711 | 5.3 | 0.515 | 6.973 | 2.8 | 17b |
| 5.136 | 2.44 | 3.293 | 0.705 | 0.9 | 6.734 | 4.568 | 2.5 | 18a |
| 4.208 | 3.22 | 3.316 | 0.702 | 1.8 | 9.546 | 3.104 | 2.1 | 18a |
| 2.934 | 2.86 | 2.725 | 0.717 | 3.6 | 8.703 | 4.467 | 1.9 | 18a |
| 6.168 | 2.71 | 3.253 | 0.717 | 1.8 | 7.718 | 8.584 | 2.7 | 18a |
| 3.922 | 2.45 | 3.255 | 0.700 | 1.8 | 6.875 | 4.461 | 2.4 | 18a |
| 8.571 | 2.40 | 2.610 | 0.721 | 1.9 | 5.765 | 4.285 | 2.8 | 18a |
| 6.281 | 2.80 | 3.094 | 0.723 | 4.2 | 7.390 | 3.140 | 2.3 | 18a |
| 8.689 | 4.83 | 3.880 | 0.682 | 6.8 | 4.406 | 5.844 | 2.5 | 18b |
| 3.654 | 2.40 | 3.103 | 0.678 | 3.2 | 4.984 | 1.827 | 2.3 | 18b |
| 6.029 | 2.34 | 3.058 | 0.654 | 1.8 | 4.062 | 0.014 | 2.6 | 18b |
| 5.261 | 3.09 | 3.298 | 0.676 | 3.6 | 5.328 | 7.130 | 2.4 | 18b |
| 6.029 | 2.92 | 3.357 | 0.660 | 1.8 | 5.328 | 9.014 | 2.7 | 18b |
| 6.292 | 3.27 | 3.517 | 0.654 | 3.2 | 7.093 | 6.646 | 2.5 | 18b |
| 6.049 | 3.26 | 3.520 | 0.666 | 1.8 | 5.750 | 6.024 | 2.6 | 18b |
