# Supplementary material for: Improvement in twins handwriting identification with invariants discretization
Source: Springer Nature journal article supplement (doi:10.1186/1687-6180-2012-48), 2012-02-28
Supplement: 13634_2011_159_MOESM6_ESM.pdf [file 13634_2011_159_MOESM6_ESM.pdf]

|        |        |        |        |        |        |        |        |     |
|--------|--------|--------|--------|--------|--------|--------|--------|-----|
| 5.7023 | 2.0254 | 2.0254 | 0.7998 | 2.0254 | 0.7998 | 2.0254 | 2.0254 | 17a |
| 4.4767 | 2.0254 | 2.0254 | 0.7998 | 2.0254 | 3.2511 | 4.4767 | 2.0254 | 17a |
| 2.0254 | 2.0254 | 2.0254 | 0.7998 | 0.7998 | 0.7998 | 9.3792 | 2.0254 | 17a |
| 5.7023 | 2.0254 | 2.0254 | 0.7998 | 0.7998 | 2.0254 | 8.1536 | 2.0254 | 17a |
| 6.9279 | 2.0254 | 3.2511 | 0.7998 | 3.2511 | 3.2511 | 9.3792 | 3.2511 | 17a |
| 8.1536 | 2.0254 | 3.2511 | 0.7998 | 2.0254 | 5.7023 | 4.4767 | 2.0254 | 17a |
| 4.4767 | 3.2511 | 3.2511 | 0.7998 | 3.2511 | 6.9279 | 9.3792 | 2.0254 | 17a |
| 4.4767 | 2.0254 | 3.2511 | 0.7998 | 2.0254 | 6.9279 | 6.9279 | 2.0254 | 17a |

|        |        |        |        |        |        |        |        |     |
|--------|--------|--------|--------|--------|--------|--------|--------|-----|
| 4.4667 | 2.0297 | 3.2482 | 0.8112 | 0.8112 | 3.2482 | 6.9037 | 2.0297 | 17b |
| 5.6852 | 2.0297 | 3.2482 | 0.8112 | 2.0297 | 2.0297 | 4.4667 | 3.2482 | 17b |
| 2.0297 | 2.0297 | 3.2482 | 0.8112 | 2.0297 | 5.6852 | 0.8112 | 2.0297 | 17b |
| 3.2482 | 2.0297 | 3.2482 | 0.8112 | 3.2482 | 4.4667 | 2.0297 | 2.0297 | 17b |
| 5.6852 | 3.2482 | 3.2482 | 0.8112 | 2.0297 | 6.9037 | 6.9037 | 2.0297 | 17b |
| 5.6852 | 2.0297 | 3.2482 | 0.8112 | 5.6852 | 6.9037 | 0.8112 | 2.0297 | 17b |
| 6.9037 | 3.2482 | 3.2482 | 0.8112 | 5.6852 | 0.8112 | 6.9037 | 3.2482 | 17b |

|        |        |        |        |        |        |        |        |     |
|--------|--------|--------|--------|--------|--------|--------|--------|-----|
| 5.3963 | 3.0251 | 3.0251 | 0.6538 | 0.6538 | 6.5819 | 4.2107 | 3.0251 | 18a |
| 8.9532 | 1.8394 | 3.0251 | 0.6538 | 1.8394 | 5.3963 | 4.2107 | 3.0251 | 18a |
| 4.2107 | 3.0251 | 3.0251 | 0.6538 | 1.8394 | 7.7676 | 6.5819 | 1.8394 | 18a |
| 6.5819 | 3.0251 | 3.0251 | 0.6538 | 1.8394 | 7.7676 | 8.9532 | 3.0251 | 18a |
| 4.2107 | 3.0251 | 3.0251 | 0.6538 | 1.8394 | 8.9532 | 3.0251 | 1.8394 | 18a |
| 3.0251 | 3.0251 | 3.0251 | 0.6538 | 3.0251 | 8.9532 | 4.2107 | 1.8394 | 18a |
| 4.2107 | 3.0251 | 3.0251 | 0.6538 | 1.8394 | 6.5819 | 4.2107 | 1.8394 | 18a |
| 6.5819 | 3.0251 | 3.0251 | 0.6538 | 4.2107 | 7.7676 | 3.0251 | 1.8394 | 18a |

|        |        |        |        |        |        |        |        |     |
|--------|--------|--------|--------|--------|--------|--------|--------|-----|
| 5.5428 | 3.0856 | 3.0856 | 0.6283 | 1.8569 | 5.5428 | 5.5428 | 3.0856 | 18b |
| 9.2287 | 4.3142 | 4.3142 | 0.6283 | 6.7714 | 4.3142 | 5.5428 | 3.0856 | 18b |
| 3.0856 | 1.8569 | 3.0856 | 0.6283 | 3.0856 | 5.5428 | 1.8569 | 1.8569 | 18b |
| 5.5428 | 1.8569 | 3.0856 | 0.6283 | 1.8569 | 4.3142 | 0.6283 | 3.0856 | 18b |
| 5.5428 | 3.0856 | 3.0856 | 0.6283 | 3.0856 | 5.5428 | 6.7714 | 1.8569 | 18b |
| 5.5428 | 3.0856 | 3.0856 | 0.6283 | 1.8569 | 5.5428 | 9.2287 | 3.0856 | 18b |
| 6.7714 | 3.0856 | 3.0856 | 0.6283 | 3.0856 | 6.7714 | 6.7714 | 3.0856 | 18b |
| 6.7714 | 3.0856 | 3.0856 | 0.6283 | 3.0856 | 4.3142 | 3.0856 | 3.0856 | 18b |
